# Supplementary material for: Antifibrotic activity of carbon quantum dots in a human in vitro model of non-alcoholic steatohepatitis using hepatic stellate cells
Source: Royal Society of Chemistry journal article supplement (doi:10.1039/d3bm01710a), 2024-01-01
Supplement: d3bm01710a1.pdf [file d3bm01710a1.pdf]

## SUPPLEMENTARY DATA

### FIGURES

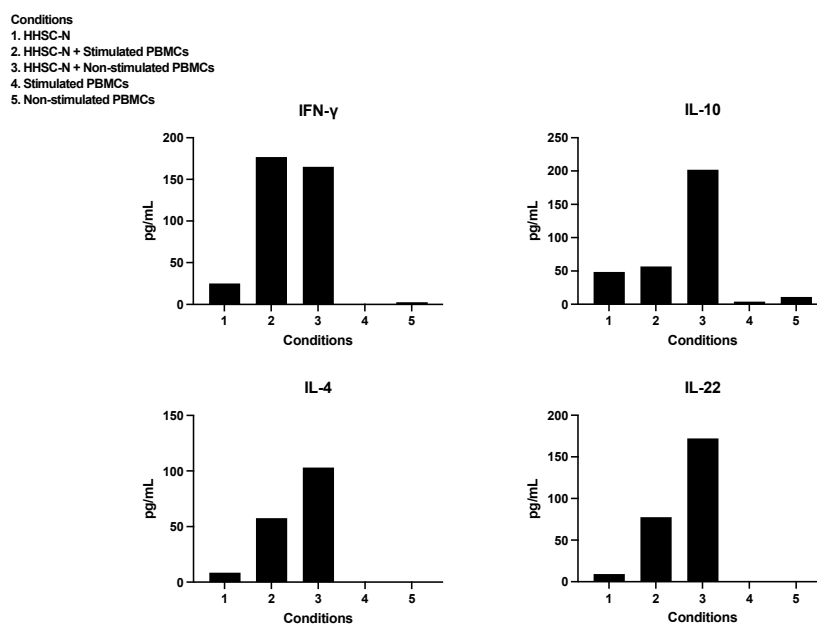

**Fig. S1.** Reference values of cytokine productions under different conditions: 1) HHSC-N, 2) HHSC-N and stimulated PBMCs co-culture, 3) HHSC-N and non-stimulated PBMCs co-culture, 4) stimulated PBMCs and 5) nonstimulated PBMCs. Samples were collected 6 h after co-culture and stimulation and were not exposed to CD or CD-LF treatments.

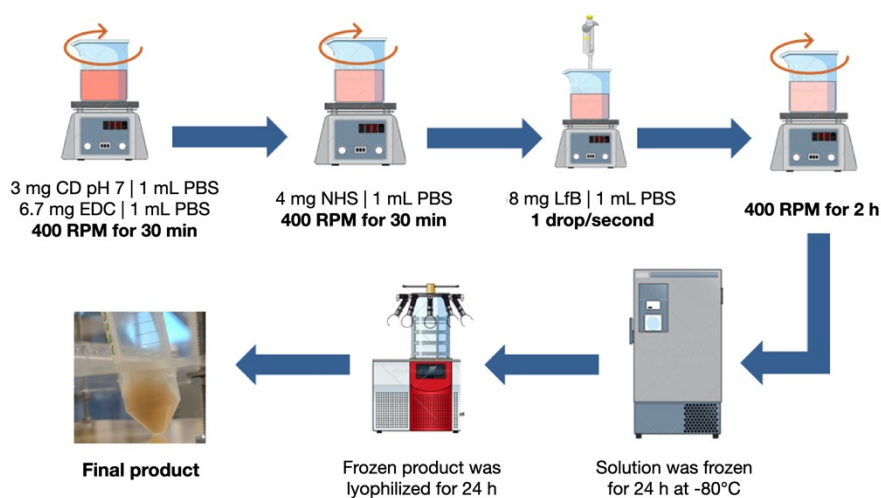

**Fig. S2.** Quantum carbon dot conjugation with bovine lactoferrin

## TABLES

**Table S1.** HHSC-N primers utilized for qPCR

| Gene   | Access number / Gene ID | Sequences                                                 | Reference                 |
|--------|-------------------------|-----------------------------------------------------------|---------------------------|
| ACTA2  | NM_001100.4             | F: CTGTTCCAGCCATCCTTCAT<br>R: TCATGATGCTGTTGTAGGTGGT      | (Ploeger et al., 2013)    |
| COL1A1 | NM_000088.4             | F: GCCTCAAGGTATTGCTGGAC<br>R: ACCTTGTTTGCCAGGTTAC         | (Ploeger et al., 2013)    |
| TIMP1  | Gene ID: 7076           | F: TGTTGTTGCTGTGGCTGATAGC<br>R: TCTGGTGTCCCCACGAACTT      | (Zheng et al., 2020)      |
| HPRT1  | NM_000194.2             | F: TGGTCAGGCAGTATAATCCAAAGA<br>R: TTCAAATCCAACAAAGTCTGGCT | (Zárybnický et al., 2019) |
